# Supplementary material
Source: publisher site journal article supplement (https://www.dovepress.com/article/445167)
Supplement: Supplementary file 1 [file get_supplementary_file.php]

**Supplementary Table 1:** Studies of Physical Treatments for LPV

| **Intervention Type** | **Study and Year** | **Country** | **Study Design** | **No. Participants** | **Sample Demographics** | **Intervention** | **Comparator Group** | **Inclusion Criteria** | **Exclusion Criteria** | **Length of Follow-Up** | **Outcome Measures** | **Reported Results** | **Treatment Side-effects** | **Study Strengths** | **Study Limitations** | **Funding** | **Additional Notes** |
| --- | --- | --- | --- | --- | --- | --- | --- | --- | --- | --- | --- | --- | --- | --- | --- | --- | --- |
| *Acupuncture* |  |  |  |  |  |  |  |  |  |  |  |  |  |  |  |  |  |
|  | Curran et al.[16](about:blank)(2010) | Canada | Case series | 8 | Age: 30 yrs (range: 21-49); Caucasian: 100%; College-educated: 75%; Marital status: Single 12.5%, In a relationship 50%, Common Law 12.5%, Married 25%; Mean symptom duration: 2.63 yrs; Ever able to use tampons: (87.5%), Currently able to use tampons: (37.5%). | 10, 1-hr acupuncture sessions x 5 wks with needle placement to the anterior & posterior parts of the body for 20-25 mins each | None | Age: >19 yrs; Diagnosis of PVD; Premenopausal; Agreed to not change other treatments during study | None reported | 6 wks | Investigator-developed metric for self-reported pain); PCS; Pain Vigilance & Awareness Questionnaire; FSFI; Qual review of practitioner session notes | Sig improvements in pain with manual genital stimulation & PCS helplessness subscale scores; No sig improvement in general intensity of pain, ability to have intercourse, or pain with intercourse from baseline to 6 wk follow-up on FSFI subscale. Practitioner notes: 7/8 (87.5%) participants reported decreased pain with intercourse; 4/8 (50%) reported increase in sexual desire & arousal; 6/8 (75%) reported improvements in non-PVD related symptoms; 7/8 (87.5%) reported increase in mindfulness & calmness | Minor bruising & fatigue which resolved over the course of treatment | Mixed methods design | Small sample size; no comparator group; possible expectancy bias | ETD Inc. (Canada) provided acupuncture needles |  |
| *Laser Therapy* |  |  |  |  |  |  |  |  |  |  |  |  |  |  |  |  |  |
|  | Murina et al.[19](about:blank) (2016) | US, Italy | Prospective case series | 37 | Age: 30.1 yrs | 3 sessions with 30W CO2 fractional laser x 30 days | None | Previous intervention failed or produced unsatisfactory results; symptoms >3 mos duration without clear identifiable cause with positive CST; Willingness to undergo a pre-enrolment 3 mos washout period for participants using systemic or local hormone replacement (estriol cream 0.05%) | Active genital infection; Moderate to severe hypertonic pelvic floor dysfunction or overactivity (determined by physician digital examination); Any circumstance deemed potentially obstructing study participation or data collection | 4 mos | Vulvar pain & burning "VAS" (NRS, 0-10); Dyspareunia scored with Marinoff & Turner system (score of 1-3); CST; Vestibular health index score of 0-3; Patient-assessed treatment satisfaction/efficacy (score of 1-4) | Sig improvement in dyspareunia & NRS pain (p <0.05) persisting at 4-mos follow-up; Sig improvement in vestibular health index (no p-value given); Treatment satisfaction: 13/37 (35.2%) patients reported "very improved", 12/37 (32.4%) reported "improved", & 12/37 (32.4%) reported no change | Transient burning after treatment which resolved in 5-6 days (n=1); No participants dropped out |  | Limited demographic data; No comparator group; Subjective outcome measures without blinding; Subjective exclusion criteria not well defined | No funding | Vulvar pain & burning assessed by NRS (reported as VAS by authors) without further explanation; Unclear if reported pain was at rest or with activity |
|  | Ninomiya & Sekiguchi.[20](about:blank) (2022) | Japan | Prospective case series | 20 enrolled; 18 completed all sessions | Age: 28.7 yrs | 3 sessions with CO2 fractional laser at 1 mos intervals; Surface anesthesia given 10-20 mins before laser irradiation; Irradiation output on "basic settings" but could be adjusted by physician | None | Identified as vestibulodynia with vestibular redness/pain; No relief from "symptomatic treatments" or PT | "Obvious" atrophy | 3 mos | "VAS" (likely NRS) for vestibular pain | NRS for vestibular pain was improved at post-treatment (8.5 before treatment, 5.1 post-treatment), no p-value given | None | 90% treatment completion rate | Specific laser settings not described; No comparator group; Limited demographic information; Unclear outcome measure (unspecified if "vestibular pain"); Use of only one outcome measure | Not supported by industry |  |
|  | Goldstein et al. 2020 (abstract)[17](about:blank); 2023 (paper)[18](about:blank) | US, Italy | Randomized double-blind, sham-controlled trial, followed by open label-treatment of sham participants | Total: 70 participants; 47 active treatment; 23 sham | Premenopausal: 71.4% with age 38.5 yrs; Postmenopausal: 28.6% with age 58.6 yrs; Ethnicity: white 98.6%, Hispanic 1.4% | Total 3 sessions at baseline, 4, & 8 wks with CO2 fractional laser; Settings: power 30W, 1000usec dwell time, 700um spacing, smartstack set at 2, D-pulse emission mode, shape: square 100%, ratio: 10/10, scanning mode: normal, & exposure mode: single; All treatments performed with single pass; Pre-treatment with topical anesthetic cream (20% benzocaine, 8% lidocaine, 6% tetracaine) based on subject & provider preference | Sham: Total 3 sessions at baseline, 4 & 8 wks with modified software delivering zero energy while maintaining look & sound of active treatment; Active treatment beginning at wk 12 | Age: 21-80 yrs; BMI <37; Reported vestibular pain min 6 mos; Positive CST; Subjects had to be willing to attempt sexual activity between visits; Lubricants were allowed; Had to continue with the same lubricant throughout the study | Clinically obvious vaginitis; Dermatologic disorders; Hypersensitivity to laser; Unwillingness to maintain estradiol/SERM if taking; Unwillingness to wash out of androgen treatment or topical vestibular medication; Pregnancy, within 3 mos postpartum, breastfeeding; Prolapse beyond hymen; Impaired wound healing; Anticoagulant use/VTE; Substance abuse within 12 mos; On investigational drug; Chronic medical/psychological condition or behavior that PI felt made the subject ineligible | 12 & 16 wks | CST pain (0-3) of the vestibule described at 1, 3, 5, 6, 7, 9 & 11 o'clock positions; Vulvoscopic photography; Vulvoscopic Genital Tissue Appearance Scale; FSFI pain domain & total score; FSDS; O'Leary/Sant Voiding & Pain Indices, MPQ | Vulvoscopic photography: sig improvement in 5 parameters in treatment vs sham groups; CST pain: sig decrease from baseline to wks 4 & 16; MPQ: Sensory & affective domains & PPI all sig improvement; FSFI, FSDS, O'Leary/Sant Voiding & Pain Indices: sig improvement from baseline to wks 12 & 16 | Mild to moderate adverse events: Burning (n=4) lasting 2-3 days; Itching (n=1) x 2-3 days; Fissure & increased vestibular pain (n=1) possibly related to procedure; No treatment required | Randomized, sham-controlled trial with double blinding; Improved generalizability due to multi-center design | Non-validated primary outcome measure (vulvoscopic genital tissue appearance scale); Measured changes from baseline in each group but comparisons between groups not reported | No funding | One subject moved & dropped out before the last follow-up; Primary outcome measure (i.e., vulvoscopic genital tissue appearance) may not be of importance to patients |
|  | Lev-Sagie et al.[21](about:blank) (2017) | Israel | RCT double-blinded | Total 34: 18 active treatment, 16 sham | Age: LLLT group 27.4 yrs; Placebo 25.4 yrs; Partnered: LLLT 83.3%, Placebo 69%; Nulliparous: LLLT 83%, Placebo 94% | Total 12 LLLT sessions: twice wkly x 6 wks with 20-sec irradiation at vestibule points; Parameters: 820 nm wavelength, 32 J/cm2 energy density, pulsed light (73, 146, 700 Hz) | Sham: Identical to treatment using the same probe without emitting irradiation. | Age: 18-50 yrs; >3 mos of insertional dyspareunia and/or pain with tampon insertion; positive CST; the sum of verbally rated NRS out of ten at five vestibular locations during CST ≥ 10 of 50 | Pregnancy; Presence of identifiable cause for pain (e.g., vaginitis, atrophy, dermatitis, or dermatosis); Antidepressant or antiseizure medication at recruitment | 1 yr | CST pain: sum of NRS out of ten at five vestibular locations; Clinical Pain Report: Dyspareunia on 100-pt scale at baseline & at completion of study (30% or less improvement = "no improvement," 30-70% improvement="moderate improvement," >70% "complete improvement"); VAS measuring discomfort in daily activities & sexual activity; NRS TT pain; Daily 24-hr pain measure & intercourse pain (scale from 1-4 assessing attempts at intercourse, NRS [0-10] pain on attempted intercourse); QoL & sexual function questionnaires using 5-point scales | Treatment group: 10, 2, & 2 (14/18, 78%) reported sig, moderate & complete dyspareunia improvement respectively; 4 (22%) reported "no improvement." Placebo group: 5 & 2 (7/16, 44%) sig & moderate dyspareunia improvement, respectively; 9 (56%) reported "no improvement" (treatment superior, p=0.042); No sig diff between the groups in CST, intercourse VAS pain, & TT pain; Neither group showed a sig diff in intercourse frequency, severity of discomfort in daily activities, or daily pain intensity | No participants reported side effects | Sham-controlled, double-blinded design; Measurement of multidimensional endpoints; 1-yr follow-up | Small sample; No improvement measurable parameters; High improvement rate in placebo group; Questionnaires were not validated; Psychological & interpersonal factors not reported | Omedic, Ra’anana, Israel provided study equipment |  |
|  | Morin et al.[2](about:blank) (2022) *NRS scale not specified | Canada | Prospective, randomized, sham-controlled pilot study | Total 40: 20 active treatment; 20 sham | Age range: 18-45 yrs | Total 12 HILT sessions twice weekly x 6 | Sham: 12 sessions twice weekly x 6 wks | Age: 18-45 yrs; Dyspareunia NRS > 5 for min 3 mos; Gynecologist assessment | None reported | 8 wks | Dyspareunia NRS; PGIC 1-10 | Sig pain reduction in active HILT group (p˂0.001) & sham group (p=0.002) from baseline to follow-up. PGIC: "Significant" improvement (79%) in active group, (47%) sham group (no p value listed), condition worsened (10%) sham group; Mean satisfaction with treatment: active group 6.6/10, sham group 4.6/10 (p<0.05) | No serious side effects in either group | Sham comparator group; High attendance; Low dropout rates | Treatment parameters for HILT not specified; Age was only demographic data reported | Not reported | >80% attended at least 10 sessions, <15% drop-out rate |
| *Physiotherapy* |  |  |  |  |  |  |  |  |  |  |  |  |  |  |  |  |  |
|  | Gentilcore-Saulnier et al.[23](about:blank) (2010) | Canada | Quasi-experimental/before & after study | Total 22: 11 with PVD; 11 control | Age with PVD: 22; Age control: 21; BMI: 22 both groups; Menarche with PVD: 12 yrs, menarche control: 13 yrs; Duration PVD: 4 yrs; Primary PVD: 64%; Avg dysmenorrhea "VAS": 4 PVD, 1 control (p≤0.03); Worst dysmenorrhea "VAS": 7 PVD, 2 control (p≤0.001); Smokers: none; Most full-time students; Most used OCP | Baseline assessment of PFM; 8 PT sessions (60-75 min each) with digital intravaginal techniques (e.g., soft tissue mobilization, stretching, desensitization), insertion techniques using dilators, pelvic floor SEMG biofeedback, electrical muscle stimulation, education, home pelvic floor exercises; Partner instruction after program completion on digital PFM stretches to perform prior to intercourse | Control group with no history of PVD: Baseline assessment of PFM; No further intervention | PVD diagnosed by study gynecologist; English fluency; Age: 18+ yrs; Sexually active; Vulvar pain during intercourse x past 6 mos | Unwilling to abstain from other treatments during study period; Generalized vulvodynia or primary vaginismus; Medical, psychiatric, or other pain conditions; Medications affecting pain processing; Pregnancy; Previous vestibular surgery; Postmenopausal status; Urinary or bowel incontinence; Cardiac pacemaker | Mean time to complete 8 treatment sessions: 12 wks; Post-treatment PFM assessment performed within 4 wks of final treatment | All able to tolerate intercourse post-PT; Dyspareunia: 42% had none, 42% had less, & 17% had no improvement; Pain with “sexual relations”: 38% had none, 54% had “almost no pain”, 8% “a lot of pain”; 83% did not undergo further treatments; Compared to baseline, statistically sig reductions in pain during penetration, during other sexual activity, after sexual activity, with touching the vulva & with tampon insertion; Time to max improvement after PT: 3 mos in 50%, 3-6 mos in 37%; Over 80% would undergo PT again; Majority (% not reported) would recommend PT wholeheartedly to a friend | Baseline: PVD group: sig greater superficial & PFM tone, superficial muscle response to painful pressure, pain intensity with MVC & pain with vaginal palpation; Sig less ability to relax PFM after MVC, PFM flexibility & lower pressure to induce pain; No differences in multiple other parameters; Post-treatment: Sig worse parameters at baseline in the PVD group normalized after PT, including pain with MVC, ability to relax PFM after MVC, superficial PFM response to painful pressure, PFM tone by palpation, PFM flexibility by palpation & pain intensity with palpation, except pressure required to produce pain did not normalize; 7/11 PVD participants (64%) had a sig reduction in LPV negative impact on QoL; Multiple other non-sig differences were reported | None reported | Wide range of PFM characteristics assessed; Some pain indicators & QoL assessed; Moderate inter-rater reliability of all measures except flexibility in prior work | Small sample size; No control group of women with PVD with no treatment; Recruitment bias; Some technical issues with SEMG recording in vulvar region; physiotherapist assessing PFM characteristics not blinded to group assignment; Primary patient functional goal (i.e., ability to have painless/enjoyable intercourse) not assessed; EMGs with motion artifact within response time (5% of observations) were excluded | College of Physiotherapists of Quebec; Physiotherapy Foundation of Canada; Canadian Foundation for Innovation/Ontario Innovation Trust; CIHR, National Vulvodynia Association grant | PT interventions (e.g., electrical stimulation & manual therapy techniques) are not standardized & may vary across practitioners depending on experience & post-professional training; Participants with PVD were compensated at a higher rate than controls; Data in Table 3 appear to be missing symbols indicating sig diff alluded to in the legend |
|  | Jahshan-Doukhy & Bornstein[25](about:blank) (2021) | Israel | Retrospective case series | 24 | Age at treatment: 27 yrs; Age at follow-up: 40 yrs; Primary LPV: 62.5%; Yrs since treatment: 13; Partnered having "intimate relations": 91.7% | Single series of at least 3 PT treatments for PFM | None | Age 18-35 at time of treatment; Diagnosis with CST by gynecologist; Prior LPV treatment with one series of at least 3 PT sessions at least 10 yrs ago | Prior treatment with more than one treatment modality or more than one series of physical therapy; Prior PT series < 3 sessions; Diagnosis with other vulvovaginal diseases | 10+ yrs since initial treatment | Composite questionnaire based on the modified Brief Pain Inventory, MPQ, & International Society of Vulvovaginal Disease Vulvodynia Questionnaire | All able to tolerate intercourse post-PT; Dyspareunia: 42% had none, 42% had less, 17% had no improvement; Pain with “sexual relations”: 38% had none, 54% had “almost no pain”, 8% reported “a lot of pain”; 83% did not undergo further treatments; Compared to baseline, statistically sig reductions in pain during penetration, during other sexual activity, after sexual activity, with touching the vulva & tampon insertion; Time to max improvement after PT: 3 mos in 50% & 3-6 mos in 37%; Over 80% would undergo PT again; Majority (% not reported) would recommend PT wholeheartedly to a friend | 13% would undergo PT again but with reservations; 8% would recommend PT to a friend with reservations | Long-term follow-up | Recall bias due to length of time since treatment; possible selection bias as those who did not have favorable outcomes from physical therapy may have chosen not to participate; no comparator group | Not reported |  |
|  | Hartmann[24](about:blank)(2011) | 12 unspecified countries | Cross-sectional survey | Women's health physiotherapists treating LPV: 218 | None reported | PT: 7-15 hr-long sessions | None | Women's Health physiotherapists treating patients with LPV | Not reported | None | Survey questions concerning PFM assessment/treatment; participation in a multidisciplinary manner; PT success rates reported by physiotherapists | 100/218 (46%) of women's health PTs reported >80% of LPV patients discharged with symptoms ‘well controlled &/or managed’; Treatment delivered to patients, PFM "downtraining" ‘always’ or ‘usually’ occurs among 83% of physiotherapists on initial evaluation; 28% report engaging patients in PFM strengthening; >70% agreed upon 16 treatment options; only 3% of physiotherapists use the validated FSFI measure | Not reported | Relatively large sample size | Recall bias, no validated tools for measurement of improvement, no direct measure of outcomes from/on patients themselves | Not reported |  |
| *PT/Transcutaneous Electrical Nerve Stimulation (TENS)* |  |  |  |  |  |  |  |  |  |  |  |  |  |  |  |  |  |
|  | Vallinga[26](about:blank) (2015) | Netherlands | Case series | 39 | Age: 26.7 yrs; Duration of symptoms: <2 to >9 yrs (>6 yrs in 45% of participants); Secondary PVD: 65%; Recurrent vaginal candidiasis: 23%; Partnered: ~2/3; All highly educated; “Negative sexual experiences”: 1/3; OCP use: 42%; SSRI use: 10%; TCA use: 3%; Prior vestibulectomy: 10%; Mean duration of TENS: 6.2 mos (range 1-12) | TENS applied to the labia majora (shaved wkly) over "nerves that innervate introitus," at 80Hz with pulse duration of 50 or 180 microseconds at max pulse intensity that was “comfortable.” PT administered initial treatment, then participant self-administered 2-3 x daily for a total daily treatment duration of 90 mins x 12-16 wks or until participant was satisfied with results | None | Age: 18-45 yrs; Diagnosed with PVD by “experienced gynecologist annex sexologist"; Ability to read & speak Dutch; Consent to participate | Cardiac pacemaker; Pregnancy | 10.1 mos (range 2-32) after last TENS treatment | MPQ-DLV (Dutch version) includes a VAS for dyspareunia & 20 groups of 3-4 pain descriptive words, arranged in increasing intensity, range 0-78; Higher score indicates higher pain & more severe pain perception; Data presented are the VAS, ”total number of words” chosen & “sum of the ranks” of words chosen; FSFI (total & subscales); FSDS; Baseline data=T1, immediately post-TENS=T2, mean 10 mos long-term follow-up=T3 | VAS dyspareunia, min & max VAS: sig improvement from T1 to T2 & maintained at T3; Number of pain descriptor words & "“sum of the ranks“" of the words sig improvement from T1 to T2 & maintained at T3; Most common pain descriptor words: Burning at all 3 points in time; Total FSFI score: sig improvement at T2 & maintained at T3; FSFI subscales: mixed; FSDS: sig improvement after treatment at T1 but not maintained at T3; Resumed intercourse at T3: 61%; Completely pain-free intercourse: 11%; Satisfactory sexual intercourse: 79%; Recommend therapy: 87%; Vestibulectomy after TENS treatment at T3: 3% | No reported pain or skin irritation from the electrodes | Convenience & self efficacy with self-administered TENS | Data were not consistently collected for all outcomes (e.g., T3 data available on 72% of participants); Unblinded study with no control group; Duration of treatment to reach benefit was not recorded; No treatment compliance data reported; No correction for sig level for multiple comparisons | Not reported |  |
| transcranial Direct-Current Stimulation (tDCS) |  |  |  |  |  |  |  |  |  |  |  |  |  |  |  |  |  |
|  | Morin et al.[27](about:blank) (2017) | Canada | Triple-blinded sham-controlled RCT | 40 total: 20 active treatment; 20 sham | Median age: 22 yrs in both groups; Median dyspareunia NRS: 6.5/10 (treatment), 7/10 (sham); Married/partnered: 100%; Relationship duration: 2.8 yrs (treatment), 2.3 yrs (sham); Median pain duration: 3 yrs (treatment), 2 yrs (sham); College or baccalaureate-level education: 70% in both groups; OCP use: all but one patient; Secondary LPV: 75% in both groups | Active: electrodes applied on participants’ scalps, anode over motor cortex, cathode over contralateral supraorbital area; 2 mA stimulation x 20 mins x 10 sessions over 2 wks | Sham: Electrodes applied in the same way as treatment group; 2mA stimulation x 30 sec for 10 sessions over 2 wks | Premenopausal age 17-40 yrs; Diagnosis of LPV by gynecologic assessment & CST; Moderate to severe NRS pain (>5/10) in at least 90% of attempted sexual interactions in the past 6 mos; Stable sexual partner; No other treatments | Other urogynecological conditions (e.g., vaginal infection or UTI); Pelvic pathology associated with pelvic pain (e.g., deep dyspareunia); Uncontrolled health conditions; Contraindications to tDCS (e.g., epilepsy) | Outcome measures collected at baseline, 2 wks assessment post-treatment & 3-mos follow-up assessment | Dyspareunia NRS (0-10); MPQ; FSFI; FSDS; Global Measure of Sexual Satisfaction; PGIC; Vaginal Penetration Cognition Questionnaire; PCS; State-Trait Anxiety Inventory; Pain Anxiety Symptoms Scale; Beck Depression Inventory | Sig reduction in dyspareunia NRS from baseline to post-treatment in both groups with no sig diff between groups; Sig reduction in sexual distress, catastrophizing, pain anxiety & improvement in sexual function between baseline & follow-up in both groups but not sig diff between groups; Sham group had superior outcomes to active treatment in some measures (e.g., MPQ score had lowest p-value at 0.004); No sig improvement in vestibular sensitivity (pressure threshold & pain tolerance) compared to sham | Mild side effects (e.g., tingling, burning, redness, fatigue, headache dizziness, & nausea) reported in both groups; Sham group reported more cathodal tingling; Active group reported more cathodal burning & erythema | Credible sham with blinding efficacy assessments; treatment provider not involved in outcome assessments | Small sample size; Authors reported lack of control for menstrual cycle phase, concern for recall bias | Research Center of the Centre hospitalier universitaire de Sherbrooke; Junior 1 research scholar of the Fonds de la recherche du Quebec-Sante | Treatment blinding was effective for participants but not for the tDCS operator |
| Shockwave |  |  |  |  |  |  |  |  |  |  |  |  |  |  |  |  |  |
|  | Yih[29](about:blank) (2020) | US | Case series | 14 | Age: 37 yrs (range: 21-74); CST 2.6/3; Mean Sexual Distress Score: 35.7/52; Means of FSFI subscales at baseline also reported | Low-intensity shockwave: 3000 shocks (1000 right/left lateral vestibule, 1000 posterior vestibule) per session x 6 sessions; Frequency: 4/sec: Membrane level 1; Energy range: 0.10-0.12mJ/mm2 as tolerated | None | Diagnosis of vestibulodynia | None reported | Outcomes measured "at the end of treatment" | CST; FSFI; Sexual Distress Scale; Tissue appearance at vulvoscopy (0-3); Patient Global Impression of Improvement (1-7) with scores of 1 to 3 considered clinically relevant | 64% (9/14) had clinically relevant Patient Global Impression of Improvement scores; CST score reduction to 1.4, reduced vulvar pallor & erythema | "No treatment related side-effects were reported" | Detailed description of treatment parameters | Small sample size; No sham comparison group; Most outcome measures used were uncommon or scored differently, making comparison with other studies difficult | No funding |  |
|  | Gruenwald et al.[28](about:blank) (2021) | Israel | Randomized, sham-controlled trial | 34 randomized 2:1; 24 assigned to LISWT, 9 assigned to sham; 23 & 9, respectively, included in data analysis | Age: 27 yrs (treatment), 25 yrs (sham); Duration of PVD: 6.9 yrs (treatment), 4.2 yrs (sham); Primary PVD: 65% (treatment), 56% (sham); Secondary PVD: 35% (treatment), 44% (sham); Past PVD treatment: 78% (treatment), 56% (sham) | LISWT: 500 pulses per session, twice wkly x 6 wks for a total of 12 sessions; Energy 0.09 mJ/mm2 | Sham: Same protocol without shockwave activation | Treatment at the Neuro-urology Unit Center over 2 year period; Diagnosis of PVD based on description of pain & positive CST | None reported | 1 & 3 mos after last treatment | Dyspareunia "VAS" [really NRS, 0-10]; Pain threshold & tolerance measured by algometer; Wong-Baker Pain FACES Scale; PGIC (0-7) | Sig reduction in dyspareunia "VAS" in treatment group (8 baseline, 5.7 at 1 mos, 4.4 at 3 mos), no change in sham group; Algometer pain threshold & tolerance increased from baseline at 1 & 3 mos in treatment group, no change in sham group; Sig improvement in Wong-Baker Pain FACES Score & total FSFI scores in treatment group from baseline at 1 & 3 mos, no changes in sham group; Moderate correlation between the "VAS" & Wong-Baker score at baseline, 1 & 3 mos; FSFI baseline to 3 months correlated with VAS and Wong-Baker score (r=-0.47, r=0.76). Improved PGIC scores in treatment group from baseline to 3 mos; First component of PGIC score sig higher in treatment group (4 ± 1.9) compared to sham group (2.3 ± 1.4) (P<0.03); Second component of the PGIC score sig lower in the treatment group (3.3 ± 1.8) compared to sham (5.5 ± 2.3) (P<0.006); PGIC scores correlated with pain (VAS & Wong-Baker) (r=0.74 & r=0.636, P<0.001). LISWT improved pain, sexual function, & QoL | One participant in active treatment group reported "self limited abdominal pain" | Authors identified randomized, controlled design, the correlated subjective questionnaires and the semi-quantitative methodology; Outcomes measured using validated questionnaires (e.g., FSFI, Wong-Baker Pain FACES score) | The authors noted small sample size, single-centre study & low reliability of subjective responses as limitations; No assessment of effectiveness of blinding procedure; Assessment of safety listed as a study aim but study was not adequately powered to assess safety | No funding | Some demographic characteristics (e.g. OCP use) appeared clinically different between groups but were not statistically different, likely due to the small sample size |
| Vestibulectomy |  |  |  |  |  |  |  |  |  |  |  |  |  |  |  |  |  |
|  | Brokenshire et al.[30](about:blank) (2014) | Australia | Case series | 30 | Age range: 22-59 yrs | Posterior vestibulectomy with biopsies | None | Persistent dyspareunia with grade 3 on Marinoff scoring system; non-responsive to conservative treatment (e.g., oral amitriptyline, PT) | Mental health or primary psychosexual health issues; Other somatic causes of pain | Assessment at 6 wk, 3 mos & 3 yrs | Marinoff’s Scoring for dyspareunia severity; Pain on intercourse | At 3 mos post-op, 77% (23/30) had no dyspareunia with 20% (6/30) had reduction, overall 97% (29/30) "good response", 3% (1/30) had no improvement. At 3 yrs, 93% (28/30) had no dyspareunia, 3% (1/30) had a reduction with the same individual showing no improvement | 1 participant reported continued dyspareunia, no others reported | 3-yr follow-up | No comparison group, small sample size | Not reported |  |
|  | Ingram[31](about:blank) (2015) | US | Case series | 210 had vestibulectomy; 190 had 3-yr follow-up | Age range: 19-68 yrs; Ethnicity: 2 biracial, 1 Filipino, remainder Caucasian | Before 1980, "local incision"; 1980 onwards "U-shaped" incision (posterior vestibulectomy) | None | Those having vestibulectomy for provoked vulvodynia localized to the peri-urethral and Bartholin’s gland duct areas between 1976-2011; Committed to 3-yr follow-up; Failing oral and topical medicines | None reported | Assessment at 6wks; 190 patients followed for a min 3 yrs | "Pain-free" or "failure" | 95% "pain-free" after min 3 yr follow-up; 5% (10/190) failures; 13% (25/190) had a repeat vestibulectomy (20 had 2 vestibulectomies, 5 had 3 vestibulectomies); 20% (5/25) failure rate for repeat vestibulectomy | 5 had post-op bleeding that required "re-suturing" within 1-48 hrs; 10 developed Bartholin's gland cysts, of which 8 had surgery | Relatively large sample size spanning 3+ decades | No comparator group; Retrospective study; Outcome assessor was not blinded; No validated outcome measures; Sampling bias | Not reported |  |
|  | Paavonen et al.[32](about:blank) (2011) [abstract]; Tommola et al.[34](about:blank) (2011) [article] | Finland | Case series | Short-term follow-up: 70; Long-term follow-up: 57 | Baseline Age: 25.5 yrs (range 20-57); OCP use: 69%; Parous 10%; History of psychiatric problems 10%; Median dyspareunia duration 4 yrs (range 1-18); Baseline median dyspareunia "VAS": 9/10 (range 8-10) | "Modified posterior vestibulectomy" | None | Presentation at The Vulva Clinic; Diagnosis of "vulvar vestibulitis" based on Friedrich's criteria; "VAS" dyspareunia score >/=7 after conservative treatment with PT, biofeedback, education; Underwent "modified posterior vestibulectomy" 1995-2007 | Somatic causes of pain | Short-term: 1 & 2 mos; Long-term median: 36 mos (range 5-158 mos) | Short-term: Surgical complications. Long-term outcomes: "VAS" (NRS) dyspareunia; Patient assessment of "current general health", "effect of vestibulectomy on symptoms", "preference for choosing the same operation again"; CST (anterior & posterior vestibule); PT evaluation of pelvic muscle tone; QoL (RAND-36 questionnaire); McCoy questionnaire (sexual well-being); Composite sexual problem index (i.e., frequency of sexual dryness during sex & dyspareunia frequency on scale of 1-7 with 1=never, 7=always); Frequency of sexual activity in preceding 1 mos | Median operative time: 45 mins (range 20-90); Sig reduction in median "VAS" dyspareunia from 9 to 3; 69% had ≥50% reduction in dyspareunia "VAS," 6% had <15% reduction, 4% unchanged; 85% absent or mild posterior vestibular pain on CST compared with 55% absent or mild pain of anterior vestibule; 13% used topical anesthetic for dyspareunia; 4% used oral amitriptyline +/- pregabalin; 26% some degree of constant unprovoked pain; higher CST "VAS" correlated with dyspareunia (Pearson 0.77), intensity of dyspareunia & the "sexual problem index score"; Of those in a sexual relationship (n=44), 14% had no dyspareunia, 58% no dyspareunia at least half of the time, 20% persistent dyspareunia; 35% of n=54 considered themselves cured, 56% had a partial response, 9.3% had no change or were worse; 91% would have chosen the operation again, 7.4% were unsure (all had persistent sig tenderness of anterior vestibule), 1.9% said no (single patient who had post-op hematoma, infection & persistent pain) | Short-term: overnight stay due to pain, nausea, bleeding or difficulty in voiding (20%); Post-op bleeding: 6 (8.6%) with 4 (5.7%) requiring surgery; OP clinic for post-op pain, non-febrile wound infection or inflammation (treated with oral antibiotics) 15.7%; Hematoma: (2); Revisit for any adverse effect (21.4%); Unilateral Bartholin’s cyst surgical excision in four (5.7%) at 16 & 24 mos after surgery; Long-term: No scarring, 4 with vulvar fissure (3 present at baseline) or 2% with new vulvar fissure | Thorough gyne exam at follow-up by physician not involved in vestibulectomy; Measured short-term & long-term outcomes; Included patient-oriented outcomes; management followed algorithm consistent with 2005 "Vulvodynia Guideline" | Medium sample size; No comparator group | Helsinki University Hospital Research Funds | Baseline pain data not retrospective; Good description of vestibulectomy & post-op care; Confidence in short-term complication reporting; CST pain on exam correlated with dyspareunia; Post-op pelvic muscle tone was not congruent with pain at follow-up; Authors recommend future RCT of poor responders to conservative management to 1 of 3 groups; Vestibulectomy, ongoing conservative management, observation only; Authors state reason for posterior vestibulectomy (2 to 10 o'clock) is because this is the location of pain in most individuals & posterior pain is most likely to cause dyspareunia |
|  | David & Bornstein[35](about:blank) (2020) | Israel | Case series | 32 | Age: 24 yrs (range 20-31); Age at follow-up: 43.12 yrs (range 35-54); Partnered: 27 (84%). Primary PVD: 28.1%, secondary PVD: 45.9%; 26% "not clear" | Total vestibulectomy (1991-2003) | None | "Significant" dyspareunia; Positive CST | Other causes of pain | Mean: 19 yrs (range 12-24). | Validated Hebrew translated questionnaire based on Modified Brief Pain Inventory & MPQ | 87.5% tolerated intercourse after 2 mos; Pain free intercourse after surgery in 90.7%, 93.8%, 96.9% by 12, 24 & 72 mos, respectively (mean 4 mos); Patient-oriented outcomes sig improvement: non-penetrative sexual activity, pain after intercourse, touch vaginal opening with finger, tampon insertion, dysuria after intercourse (p < 0.001); wearing tight clothing, sitting with crossed legs (p=0.004-0.009); dysuria & other (p=0.024 - 0.031); Mean dyspareunia improvement with surgery from 9.13/10 NRS to 0.47/10 (p<0.001); One participant had intramuscular interferon, 1 used unspecified topical cream. 94% were "highly satisfied"; 97% would undergo vestibulectomy again, 84.4% would "wholeheartedly" recommend to a friend; 15.6% would hesitantly recommend; 16% would prefer to exhaust non-surgical options before vestibulectomy; Primary LPV & secondary LPV; No difference in outcomes | No complications were recorded during or after surgery | Long-term follow-up study | Survey selection bias; Recall bias; In-person questionnaire response rate: 32/85 (38%); No comparator group | Galilee Medical Center's research fund | Participants estimated pre-op pain at mean 19-yr follow-up |
|  | Yee, Goldstein, et al.[36](about:blank) (2022) [abstract]; Yee Uloko, et al.[37](about:blank) (2022) [abstract] | US | Case Series | 14 | Age: 26 yrs; Prior vestibulectomies: 2 with 2, 1 with 3 | Complete Vestibulectomy | Compared procedure difficulty & blood loss to those without prior vestibulectomy | Persistent "significant" dyspareunia after prior posterior vestibulectomy & anterior vestibular pain with CST; Min 10 yrs follow-up | Other forms of vulvodynia by history | Min: 3 yrs | Pain-free vaginal penetration | 71% pain-free penetration after vestibulectomy; Posterior fibrosis resulted in more challenging dissection than in those without prior surgery | 50mL additional blood loss compared to vestibulectomy in those without prior procedure | Reports on repeat vestibulectomy | Small case series | No funding |  |
|  | Swanson et al.[33](about:blank) (2014) | US | Case Series | 115 | Median age: 33.7 yrs, Range: 16-69; White: 98.3%; Prior treatments >1 yr prior to surgery: 93/115 (80.9%), >6 yrs 27/115 (23.5%); Prior treatment: oral meds 64 (55.7%), vag ungt or creams 95 (82.6%), other med specialty services 41 (35.7%), PT 26%, anesthesia 11%, psychotherapist 10%, sex therapist 9% | Modified Vestibulectomy (U-shaped incision, 1998-2010) | None | Failed medical treatment of LPV, those who returned the survey | None reported | Median: 5.8 yrs (range 1.1-13) | NRS for overall pain; 4-point Likert-type scale (sig improvement, moderate, no change, worse) for pain improvement with tampon insertion & dyspareunia; Yes/No for pain wearing tight pants, riding a bicycle, sitting | Overall NRS pain on a "typical day" >=7/10 decreased from 57% to 9%; Median NRS pain decreased from 7/10 to 0/10; 84% had "moderate to significant" improvement in dyspareunia, 12% had no change, 2.8% worse dyspareunia, 0.9% did not attempt; 71 reported pre-op pain with tampon insertion, 52/71 attempted tampon insertion post-op, & of those, 90% had "moderate to significant improvement"; Of those with pain wearing tight pants, riding a bicycle, & sitting pre-op, 57%, 47%, & 72%, respectively, had no pain post-op; Absence of dyspareunia occurred in 73% between 3 mos to 1 yr & reached >80% after 6 yrs; 79% were very or somewhat satisfied, 15% somewhat or very dissatisfied; 90% glad they underwent procedure; 59% would definitely recommend the procedure, 24% would probably recommend it | Decreased vaginal lubrication: 37%; Decreased sensation in any part of the vulva: 10%; Hematoma 0.9%; Retained suture 0.9%; Bartholin duct cyst requiring surgery: 1.7%; Recurrent yeast infections: 13% | 37% decreased vaginal lubrication, 10% decreased sensation in any part of vulva, hematoma & retained suture 0.9% each, Bartholin duct cyst requiring surgery 1.7%, recurrent yeast infections 13% | Recall bias for retrospective estimates of pre-op pain after median 6 yr post intervention; Participation bias | None | Questionnaire response rate: 57.5% |

**Notes:**

"Age" refers to mean age unless otherwise stated

CST: cotton swab test

Diff: Difference/s

FSDS: Female Sexual Distress Score

FSFI: Female Sexual Functioning Index

HILT: High-Intensity Laser Therapy

LISWT: Low-Intensity Shockwave Therapy

LLLT: Low-Level Laser Therapy

Max: Maximum

Min: Minimum

Mos: month/s

MPQ: McGill Pain Questionnaire

NRS: Numeric Rating Scale

OCP: Oral Contraceptive Pill

PCS: Pain Catastrophizing Scale

PFM: pelvic floor muscle

PGIC: Patient Global Impression of Change

Physiotherapy: PT

PI: Principal Investigator

PPI: Present Pain Intensity

PVD: Provoked vestibulodynia

QoL: Quality of Life

RCT: randomized controlled trial

SERM: estradiol or selective estrogen receptor modulator

Sig: Significant

tDCS: transcranial Direct-Current Stimulation

VAS: Visual Analog Scale

vs: versus

VTE: venous thromboembolic disease

Wk/s: week/s

Yr/s: years
