# Supplementary material
Source: publisher site journal article supplement (https://www.dovepress.com/article/445167)
Supplement: Supplementary file 2 [file get_supplementary_file.php]

## Appendix 1: Inclusion and Exclusion Criteria

| Inclusion Criteria                                                                                                                                           | Exclusion Criteria                                                                                                                                                             |
|--------------------------------------------------------------------------------------------------------------------------------------------------------------|--------------------------------------------------------------------------------------------------------------------------------------------------------------------------------|
| Populations<br>-Humans<br>-LPV<br>-Vulvar pain<br>-Vestibulodynia                                                                                            | Populations<br>-Non-human studies<br>-PGAD<br>-Chronic pelvic pain<br>-Vaginal pain<br>-Vaginismus<br>-Dyspareunia<br>-Generalized vulvodynia with no specific analyses of LPV |
| Study Type<br>-Peer-reviewed journal articles<br>-Dissertations<br>-Editorials<br>-Commentaries<br>-Grey literature<br>-Systematic reviews<br>-Meta-analyses | Study Type<br>-Etiological studies<br>-Methodology studies<br>-Novel diagnostic tool studies<br>-Protocols<br>-Papers not relating to effectiveness or efficacy of a therapy   |
| Publication between 1/2010 and 3/30/2023                                                                                                                     | Publication outside of designated timeframe                                                                                                                                    |
| English or French language                                                                                                                                   | Other language                                                                                                                                                                 |
| Interventions<br>-Pharmaceutical therapy<br>-Physiotherapy<br>-Psychological therapy<br>-Alternative therapies<br>-Complementary therapies                   |                                                                                                                                                                                |

## Appendix 2: Search Strategies

### PubMed (includes Medline), search conducted 15 June 2021

| #  | Query                                                                                                                                         | Results |
|----|-----------------------------------------------------------------------------------------------------------------------------------------------|---------|
| #1 | ("vulvodynia"[Mesh] OR vulvodynia[tw] OR "vulvar pain"[tw] OR "vulvar vestibulitis"[Mesh] OR "vulvar vestibulitis"[tw] OR vestibulodynia[tw]) | 1,319   |
| #2 | #1 AND ("2010"[Date - Publication] : "3000"[Date - Publication])                                                                              | 737     |

### Embase via embase.com, search conducted 15 June 2021

| #  | Query                                                                                                                                           | Results |
|----|-------------------------------------------------------------------------------------------------------------------------------------------------|---------|
| #1 | ('vulvodynia'/de OR vulvodynia:ti,ab OR 'vulvar pain':ti,ab OR 'vulvar vestibulitis'/de OR 'vulvar vestibulitis':ti,ab OR vestibulodynia:ti,ab) | 2,582   |
| #2 | #1 AND [2010-2021]/py                                                                                                                           | 1,669   |

### CINAHL Plus via EBSCOhost, search conducted 15 June 2021

| #  | Query                                                                                                                                                                                                                     | Results |
|----|---------------------------------------------------------------------------------------------------------------------------------------------------------------------------------------------------------------------------|---------|
| S1 | (MH "Vulvodynia" OR TI vulvodynia OR AB vulvodynia OR TI "vulvar pain" OR AB "vulvar pain" OR MH "Vulvar Vestibulitis" OR TI "vulvar vestibulitis" OR AB "vulvar vestibulitis" OR TI vestibulodynia OR AB vestibulodynia) | 656     |
| S2 | S1 AND Limiters - Published Date: 20100101-20211231                                                                                                                                                                       | 407     |

### APA PsycInfo via EBSCOhost, search conducted 15 June 2021

| #  | Query                                                                                                                                                                      | Results |
|----|----------------------------------------------------------------------------------------------------------------------------------------------------------------------------|---------|
| S1 | (TI vulvodynia OR AB vulvodynia OR TI "vulvar pain" OR AB "vulvar pain" OR TI "vulvar vestibulitis" OR AB "vulvar vestibulitis" OR TI vestibulodynia OR AB vestibulodynia) | 352     |
| S2 | (S1 AND Limiters - Published Date: 20100101-20211231                                                                                                                       | 221     |

### CENTRAL via Cochrane Library, search conducted 15 June 2021

| #  | Query                                                                                                                     | Results |
|----|---------------------------------------------------------------------------------------------------------------------------|---------|
| S1 | [mh "vulvodynia"] OR vulvodynia OR "vulvar pain" OR [mh "vulvar vestibulitis"] OR "vulvar vestibulitis" OR vestibulodynia | 218     |
| S2 | S1 AND Custom Year 2010-present                                                                                           | 170     |

### Proquest Dissertations and Theses Global via Proquest, search conducted 15 June 2021

| #  | Query                                                                                                                                                    | Results |
|----|----------------------------------------------------------------------------------------------------------------------------------------------------------|---------|
| S1 | ti(vulvodynia OR "vulvar pain" OR "vulvar vestibulitis" OR vestibulodynia) OR ab(vulvodynia OR "vulvar pain" OR "vulvar vestibulitis" OR vestibulodynia) | 53      |
| S2 | S1 AND Limiters – Publication Year: 2010-2021                                                                                                            | 23      |

**Theses & Dissertations**

*All searches conducted for date range 2010 – 7 June 2021.*

**OpenGrey** - <http://www.opengrey.eu/>

Search: Various terms. Ex. vulvodynia, "vulvar pain", "vulvar vestibulitis", vestibulodynia, vestibulectomy

**NDLTD Global ETD Search**- <http://search.ndltd.org/>

Search: vulvodynia OR "vulvar pain" OR "vulvar vestibulitis" OR vestibulodynia OR vestibulectomy

**Google Scholar Thesis/Dissertation Search** - <https://scholar.google.ca/>

Search: vulvodynia OR "vulvar pain" OR "vulvar vestibulitis" OR vestibulodynia OR vestibulectomy  
site:.ca OR site:.uk OR site:.edu OR site:.au OR site:.nz OR site:.eu
